# Supplementary material for: The Relationship Between Mindfulness and Negative Emotion Differentiation: a Test of Multiple Mediation Pathways
Source: Springer Nature journal article supplement (doi:10.1007/s12671-016-0669-7), 2016-12-26
Supplement: MOESM1 [file 11959778]

**Supplementary Material**

We address two issues in Supplementary Material. The first issue concerns the relationships between individual emotions and attribution appraisals. The second issue concerns whether event-type moderated the relationship between mindfulness and the dependent outcomes (emotion differentiation, appraisal differentiation, maladaptive emotion regulation, and adaptive emotion regulation).

**Emotion-Appraisal Relationships**

Using Hierarchical Linear Modeling (Raudenbush & Bryk, 2002), each emotion was regressed onto all six attribution appraisals simultaneously in a series of Level 1 analyses (see Supplementary Table). Several findings that are consistent with prior studies (e.g., Ellsworth & Smith, 1988; Frijda et al. 1989; Scherer, 1997; Smith & Ellsworth, 1985) can be noted. First, anger, contempt and disgust were associated with seeing someone else and not the self as responsible for the target event (agency-other and agency-self), indicating that these emotions are associated with perceptions of blame. Fear, frustration, and sadness were associated with the perception that events are controlled by the situation (control-circumstances). Frustration and sadness were also negatively related to control-self, reinforcing the theme of helplessness associated with these emotions. Consistent with Smith and Ellsworth (1985), boredom was found to be negatively associated with both agency- and control-self, and positively associated with agency-other.

Other findings highlight unresolved inconsistency between past studies. For example, the negative relationship between anger and control-self and the positive relationship between guilt and agency-circumstances found in the current study are not consistent with some prior Western findings (Smith & Ellsworth, 1988; Scherer, 1997), but are in line with the results of Tong et al. (2007) who sampled from the same local population. Some unexpected relationships were found. In particular, it is not clear why guilt and shame was negatively (instead of positively) associated with agency-self. Guilt was nonetheless positively associated with control-self, suggesting that guilt could be elicited from the sense that one has the ability to influence a negative event but has done nothing about it. Such inconsistencies and unexpected findings could be due to cultural and methodological differences between the current and past studies, and should be investigated further in future research.

**The Moderating Influence of Event Type**

Participants were also asked to indicate in each observation whether the target event was a positive, negative, or neutral event. A question is whether the relationships examined here might differ depending on the valence of events encountered. From these categorical event ratings, we constructed two variables; in one variable, positive events were coded as 1, other events were coded as 0; in the other variable, negative events were coded as 1, other events as 0. These score were then averaged within-participants such that each participant had two scores signifying the frequency of positive events or negative events, respectively, relative to other events. We conducted a series of moderation analyses, regressing emotion differentiation, appraisal differentiation, maladaptive emotion regulation, and adaptive emotion regulation in separate analyses, onto mindfulness, the positive index, the negative emotion index, and the interaction terms between mindfulness and each event index (all predictors were standardized). Most pertinent for our purpose is that none of the interaction terms were significant, all *β*s < .07, *p*s > .18, indicating that the relationships between mindfulness and the criterion variables did not differ depending on the events encountered.

Supplementary Table

*Negative emotion-appraisal relationships from HLM simultaneous regression analysis*

|  | Agency-Self | Agency-Others | Agency-circumstances | Control-Self | Control-others | Control-circumstances |
| --- | --- | --- | --- | --- | --- | --- |
| Anger | -.25*** | .18***1 | -.02 | -.08*** | .06* | .10*** |
| Boredom | -.12*** | .05* | .05 | -.10*** | .01 | .02 |
| Contempt | -.08*** | .11*** | .02 | -.01 | .04* | .04* |
| Disgust | -.14*** | .11*** | .01 | -.07*** | .05* | .07*** |
| Fear | -.12*** | .06* | .09*** | .021 | .03 | .11***1 |
| Frustration | -.34*** | .19*** | .04 | -.08** | .04 | .13*** |
| Guilt | -.10***1 | .031 | .05* | .05* | -.01 | .05 |
| Sadness | -.18*** | .08*** | .04 | -.06**1 | .07** | .10***1 |
| Shame | -.08*** | .02 | .03 | .00 | .03* | .05* |

* *p* < .05; ** *p* < .01; *** *p* < .001. All coefficients are standardized coefficients. 1Seven out of these 54 relationships were also tested in Tong (2010) but for a different research purpose and using a different analytical approach in which a different set of predictors were entered to predict each emotion. Hence, there is no overlap in results between this paper and Tong (2010).

**Reference for Supplementary Material**

Ellsworth, P. C., & Smith, C. A. (1988). From appraisal to emotion: Differences among unpleasant feelings. *Motivation and Emotion, 12*, 271–302. [doi: 10.1007/BF00993115](http://dx.doi.org/10.1007/BF00993115)

Frijda, N. H., Kuipers, P., & ter Schure, E. (1989). Relations among emotion, appraisal, and emotional action readiness. *Journal of Personality and Social Psychology, 57*, 212-228. [doi: 10.1037/0022-3514.57.2.212](http://dx.doi.org/10.1037/0022-3514.57.2.212)

Raudenbush, S. W., & Bryk, A. S. (2002*).* ***Hierarchical linear models: Applications and data analysis methods (2nd Ed.).*** Thousand Oaks, Calif.: Sage Publications.

Scherer, K. R. (1997). Profiles of emotion-antecedent appraisal: Testing theoretical predictions across cultures. *Cognition and Emotion, 11*, 113-150. [doi: 10.1080/026999397379962](http://dx.doi.org/10.1080/026999397379962)

Smith, C. A., & Ellsworth, P. C. (1985). Patterns of cognitive appraisal in emotion. *Journal of* *Personality and Social Psychology, 48*, 813-838. [doi: 10.1037/0022-3514.48.4.813](http://dx.doi.org/10.1037/0022-3514.48.4.813)

Tong, E. M. W. (2010). Personality influences in appraisal-emotion relationships: The role of Neuroticism. *Journal of Personality, 78*, 393-417. <http://dx.doi.org/10.1111/j.1467-6494.2010.00620.x>

Tong, E. M., Bishop, G. D., Enkelmann, H. C., Why, Y. P., Diong, S. M., Khader, M., & Ang, J. (2007). Emotion and appraisal: A study using ecological momentary assessment. *Cognition and Emotion*, *21*(7), 1361-1381. DOI:10.1080/02699930701202012
